REVIEW PAPER

# The role of xylem class III peroxidases in lignification

Kaisa Marjamaa<sup>1</sup>, Eija M. Kukkola<sup>2</sup> and Kurt V. Fagerstedt<sup>2,\*</sup>

<sup>1</sup> Technical Research Center of Finland (VTT), PL 1000, 02044 VTT, Finland

<sup>2</sup> Department of Biological and Environmental Sciences, Plant Biology, PO Box 65, FI-00014 Helsinki University, Finland

Received 2 September 2008; Revised 12 October 2008; Accepted 14 October 2008

## Abstract

Lignification is a cell wall fortifying process which occurs in xylem tissue in a scheduled manner during tissue differentiation. In this review, enzymes and the genes responsible for lignin biosynthesis have been studied with an emphasis on lignin polymerizing class III secretable plant peroxidases. Our aim is to understand the cell and molecular biology of the polymerization of lignin especially in tracheids and vessels of woody species but much of the experimental evidence comes from herbaceous plants. Class III peroxidases pose many problems for empirical work as their encoding genes are variable, their substrate specificities are wide and the half-life of many of the isozymes is very long. However, there is some evidence for the role of specific peroxidases in lignin polymerization through antisense mutants in tobacco and poplar and from tissue and cell culture lines of *Picea abies* and *Zinnia elegans*. Peroxidase enzyme action has been shown by substrate specificity studies and, for example, RT-PCR results have pointed out that many peroxidases have tissue-specific expression patterns. Tissue-level location of gene expression of some peroxidases has been studied by *in situ* hybridization and their cellular localization with antibodies and using EGFP-fusion genes. From these, it can be concluded that, although many of the xylem class III peroxidases have the potential for functioning in the synthesis of the lignin polymer, the combined information of catalytic properties, expression, and localization can reveal differences in the significance of different peroxidases in the lignification process.

**Key words:** Cell wall, lignin, peroxidase, polymerization.

## Introduction

Lignin is a natural, branched plant biopolymer generated by radical coupling of hydroxycinnamyl subunits called monolignols, mainly coniferyl (CA), sinapyl (SA), and *p*-coumaryl alcohols (*p*-CA) and creates, together with hemicelluloses, a glueing matrix for cellulose microfibrils in tracheary elements (TEs) and fibres of higher plants (Boerjan *et al.*, 2003). Lignification in TEs and fibres occurs along the secondary cell wall formation which is initiated in tree xylem from cell corners and middle lamellae. Eventually, these cells die through programmed cell death. Lignin provides mechanical strength and resistance against pathogens, and makes the cell walls impermeable to water, thus enabling the transport of solutes via tracheids in the xylem tissue. In addition to lignification during growth, lignification also occurs as a stress response (Kim *et al.*, 2008; Srivastava *et al.*, 2007).

The biosynthesis of monolignols initiates from the general phenylpropanoid pathway where phenylalanine is converted to *p*-coumaryl CoA via a series of enzymatic reactions, catalysed by phenylalanine ammonia lyase (PAL), cinnamate 4-hydroxylase (C4H), and 4-coumarate coenzymeA: ligase (4CL) (reviewed by Boerjan *et al.*, 2003; Fig. 1). Monolignols are synthesized from *p*-coumaryl CoA via aromatic ring hydroxylation, *O*-methylation and conversion of side chain carboxyl to an alcohol, after which they are transported to the cell wall (Boerjan *et al.*, 2003; Fig. 1).

The transport mechanisms of monolignols from the cytoplasm to the cell wall are still largely unknown. Monolignols are found in plants both as free and sparingly water-soluble monolignols and as water-soluble monolignol glucosides. The latter, namely coniferin, syringin, and *p*-coumaryl alcohol glucoside, have been proposed to be

\* To whom correspondence should be addressed: E-mail: kurt.fagerstedt@helsinki.fi

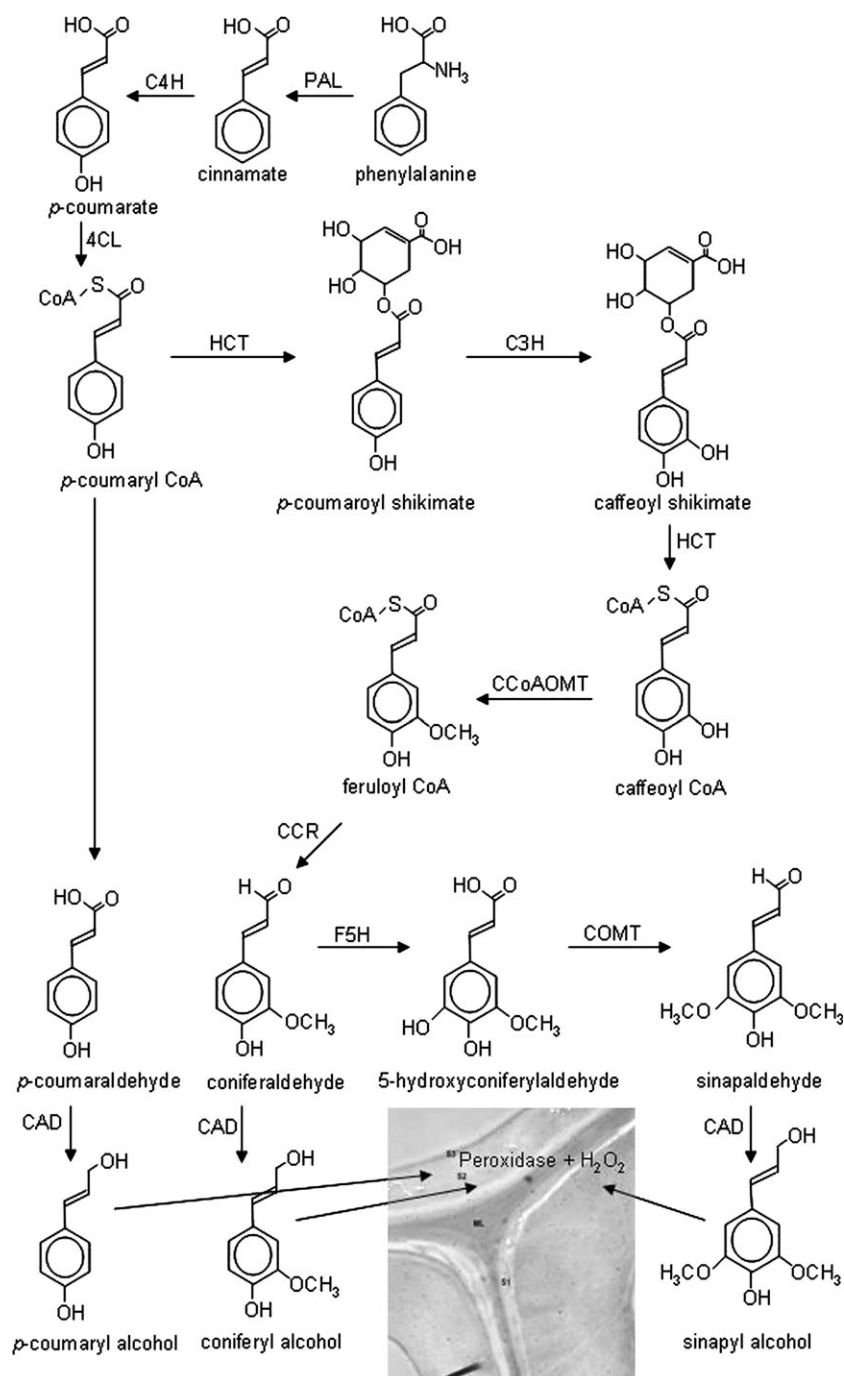

**Fig. 1.** Enzymatic pathway leading to the synthesis of monolignols CA, SA, and *p*-CA. See text for abbreviations. The transmission electron micrograph is of Norway spruce (*Picea abies*) mature tracheid cell wall which has been gold labelled with an antibody directed against dibenzodioxocin, a lignin substructure (for further details, see Kukkola *et al.*, 2003).

either transport forms, intermediates or storage forms of monolignols (Steeves *et al.*, 2001; Tsuji and Fukushima, 2004). Coniferin accumulation has been found to correlate spatially and temporally with the beginning of secondary growth in conifers (Freudenberg and Harkin, 1963; Savidge, 1989). In *Arabidopsis thaliana*, coniferin and syringin accumulation has been observed in light-treated roots (Hemm *et al.*, 2004). Monolignol deglycosylation is thought to occur in the cell wall, at the site of lignin polymerization by specific  $\beta$ -glucosidases.  $\beta$ -Glucosidases with the ability to

catalyse the deglycosylation of monolignols have been identified in Norway spruce (*Picea abies*) (Marcinowsky and Grisebach, 1978), in some *Pinus* species (Leinhos *et al.*, 1994; Dharmawardhana *et al.*, 1995), and in *A. thaliana* (Escamilla-Treviño *et al.*, 2006).

For monolignol transport through the plasma membrane, either as free monolignols or as glucosides, four possible mechanisms can be envisaged: (i) passive diffusion through the plasma membrane based on hydrophobic interactions, (ii) Golgi-mediated vesicle transport, (iii) active transport

via plasma membrane-located ATP-binding cassette (ABC) transporters, and (iv) facilitated diffusion through plasma membrane channels.

There is some evidence on the passive diffusion of monolignol-like compounds through membranes of artificial liposomes due to hydrophobic–hydrophilic interactions, but there is no evidence as yet that this transport possibility would be found in plant tissues (Boija and Johansson, 2006). An elaborate study by Kaneda *et al.* (2008) with radiolabelled  $^3\text{H}$ -phenylalanine fed to *Pinus contorta* seedlings supported a model where, as yet unknown, membrane transporters, rather than Golgi vesicles, would export the monolignols into the apoplastic space. Also, in global transcript profiling of *A. thaliana* stems, seven genes coding for ABC transporters have shown similar expression profiles to known monolignol biosynthetic genes (Ehlting *et al.*, 2005). The cell wall macroarray analysis of maize (*Zea mays*) brown mid-rib (*bm*) mutants with altered lignin compositions has indicated that in one of the mutant lines, *bm2*, the decreased guaiacyl lignin levels may be due to decreased transcription of one of the ABC-transporter genes (Guillaumie *et al.*, 2007).

In the developing cell wall, lignin polymerization occurs by radical coupling reactions (Freudenberg, 1959). The secondary cell walls of xylem cells consist of three sublayers (S1, S2, and S3). Cell wall lignification initiates from cell corners and middle lamellae, proceeding through S1, S2, and S3 together with cell wall thickening. The deposition of specific lignin substructures has been demonstrated with immunolabelling techniques (Kukkola *et al.*, 2003, 2004; see also Fig. 1). Monolignol oxidation/dehydrogenation is one of the earliest cellular functions proposed for peroxidases (PRXs) (Harkin and Obst, 1973). They are often found in lignifying tissues and they have the capability to oxidize a wide variety of small phenolic compounds, including monolignols. However, other enzymes with monolignol oxidizing activity, such as laccases and other phenol oxidases have been found in lignin-forming tissues, but their exact role in lignin polymerization is still unclear.

Class III plant PRXs are secreted plant enzymes apparently found in all land plants but not in unicellular green algae (Passardi *et al.*, 2004). It has been suggested that class III PRXs may have played an important role in the adaptation of plants to life out of water and to a radical change in the oxygen environment allowing, for example, the formation of the PRX substrate hydrogen peroxide (Passardi *et al.*, 2004). PRXs typically exist as large gene families with 73 genes in *Arabidopsis thaliana* (Welinder *et al.*, 2002) and 138 in rice (*Oryza sativa*) (Passardi *et al.*, 2004). Even though there is apparent functional redundancy, the cellular localization and functions of most of the isoenzymes coded by different PRX genes remain incompletely understood. PRXs may also have other roles, for example, in the modification of cell wall structures such as suberin polymerization (Arrieta-Baez and Stark, 2006), cross-linking the structural non-enzymatic proteins such as extensins (Jackson *et al.*, 2001), catalysing the formation of diferulic acid linkages between polysaccharide bound lignins or ferulic acid residues in polysaccharides (Fry,

2004), and production of hydroxyl radical with the ability to cleave cell wall polysaccharides (Schweikert *et al.*, 2000).

In this article, the PRX gene and protein nomenclature of PeroxiBase (<http://peroxibase.isb-sib.ch/index.php>) has been followed and the original published names of the genes added in parentheses after the PeroxiBase name.

## PRX catalysis and lignification

In the regular PRX catalytic cycle, one molecule of hydrogen peroxide ( $\text{H}_2\text{O}_2$ ) is reduced and two molecules of reducing substrates are oxidized (Fig. 2). Typically, class III plant PRXs are able to oxidize a wide variety of small phenolic compounds, including the lignin monomers, monolignols. However, differences between the abilities of different PRXs to oxidize different monolignols occur. While coniferyl alcohol is easily oxidized by most of the PRXs, sinapyl alcohol seems to be a poor substrate for many and it has been suggested that, even during lignin synthesis, sinapyl alcohol dehydrogenation is mediated by other phenolic radicals (Takahama and Oniki, 1994; Takahama, 1995). The reason for this kind of sinapyl compound discrimination of *A. thaliana* AtPrx53 (ATP A2) (Nielsen *et al.*, 2001) has been studied by docking monolignols and ferulic acid to the substrate binding site AtPrx53 in the X-ray structure of *A. thaliana* PRX (Østergaard *et al.*, 2000). Here, docking coniferyl alcohol and ferulic acid resulted in identical hydrophobic interactions with the enzyme, involving amino acid residues P69, I138, P139, S140, R175, and V178. Docking *p*-coumaryl alcohol gave fewer interactions, suggesting weaker binding of the substrate. Instead, docking sinapyl alcohol in the same orientation as the other substrates was not successful because of the overlapping of I138 and P139 with the second methoxyl group in sinapyl alcohol (Østergaard *et al.*, 2000). Since P139 is conserved in the class III PRX superfamily, the authors proposed that this structural hindrance of sinapyl alcohol binding is occurring in all the family members.

However, class III PRXs with the ability to oxidize sinapyl alcohol have been purified from, for example, tomato (*Lycopersicon esculentum*) (Quiroga *et al.*, 2000), poplar (*Populus alba*) cell culture (Ayoama *et al.*, 2002), *Zinnia elegans* (Gabaldón *et al.*, 2005), and silver birch (*Betula pendula*) (Marjamaa *et al.*, 2006a), suggesting that an unmediated way to oxidize sinapyl alcohol by PRXs exists. Recently, Gomez Ros *et al.* (2007) identified common motifs in the primary structures of known sinapyl alcohol oxidizing PRXs. Interestingly, the sinapyl alcohol oxidizing PRX PalPrx08 (CWPO-C) from poplar cell culture is also able to oxidize larger substrates, synthetic lignin polymers, and ferrocyclochrome *c*, suggesting participation in radical formation in the lignin polymer (Sasaki *et al.*, 2004). Structural modelling of PalPrx08 predicts that the substrate binding site of this enzyme is similar to those of the other plant PRXs suggesting that these large substrates do not interact with the haem, for which reason a second substrate oxidation site on the surface of the protein was expected

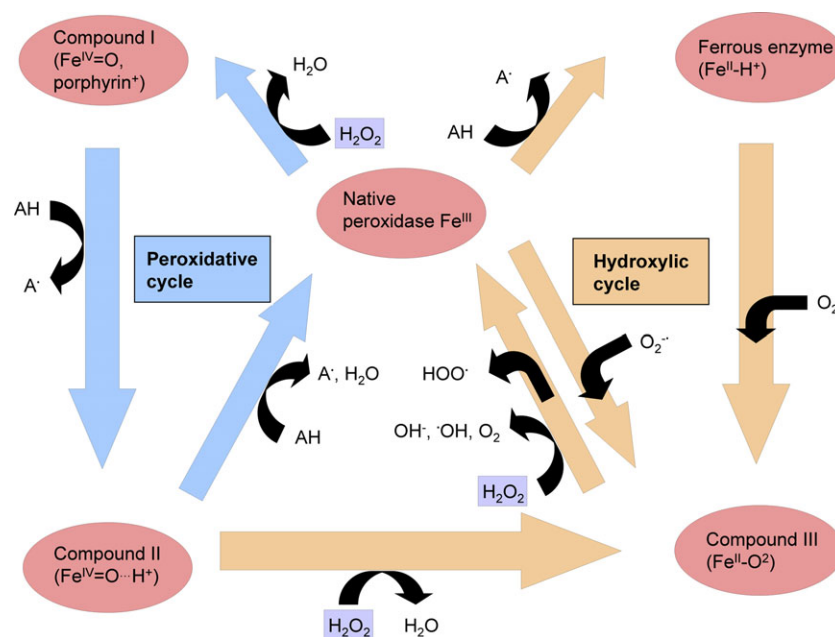

**Fig. 2.** The five oxidation states of the peroxidase enzyme (red ovals): native peroxidase, compounds I, II, and III, and ferrous enzyme. The peroxidative cycle (arrows in blue) is predominant in creating monolignol radicals for lignin polymerization and uses H<sub>2</sub>O<sub>2</sub> for oxidative power. However, peroxidases are capable of producing very reactive oxygen free radical species in the hydroxylic cycle, such as superoxide (O<sub>2</sub><sup>-•</sup>), the hydroxyl radical (OH<sup>•</sup>) and the hydroperoxyl radical (HOO<sup>•</sup>), which can oxidize surrounding molecules at random and can be used, for example, for defence purposes. AH, reducing substrate such as a monolignol. The PRX catalytic cycles have been adapted from Berglund *et al.* (2002) and reproduced by kind permission of the Nature Publishing group, and Liskay *et al.* (2003).

(Sasaki *et al.*, 2008). PalPrx08 contains two specific Tyr residues, Tyr-74 and Tyr-177, which, according to the structural model, are both exposed on the protein surface and located near the haem, thus having potential for participation in electron transfer (Sasaki *et al.*, 2008). Chemical modification of PalPrx08 Tyr residues to 3-nitrotyrosine with tetranitromethane (TNM) indeed resulted in decreased oxidation of syringaldazine, a dimeric sinapyl alcohol analogue, and prevented ferrocyclochrome *c* oxidation, proposing the involvement of these residues in the oxidation of large substrates (Sasaki *et al.*, 2008).

The peroxidative cycle of PRXs consumes hydrogen peroxide, which in the cell wall can be generated by, for example, NADPH oxidases (Ros Barceló *et al.*, 2002), amine oxidase (Møller and McPherson, 1998), and oxalate oxidases (Caliskan and Cuming, 1998), and in certain conditions, for example, in the presence of NADH or during auxin oxidation even PRXs themselves (Liskay *et al.*, 2003; Kawano, 2003) are able to catalyse the formation of hydrogen peroxide. It can be argued that the availability of H<sub>2</sub>O<sub>2</sub> has a role in lignification as one of the controlling factors in lignin polymerization. It has been found out that in the lignin-forming tissue-culture system of Norway spruce (*Picea abies*), inhibition of PRX activity through H<sub>2</sub>O<sub>2</sub> scavenging caused a drastic reduction in lignin formation (Kärkönen *et al.*, 2002). In addition, transgenic tobacco plants overexpressing the PRX gene *IbPrx04* (*swpa4*) have shown increased H<sub>2</sub>O<sub>2</sub> production which may have caused their increased lignin and phenolic content (Kim *et al.*, 2008). Induced lignification and increased expression of lignin

biosynthetic genes has been found in transgenic hybrid aspen trees with elevated extracellular hydrogen peroxide concentrations due to the expression of antisense superoxide dismutase (Srivastava *et al.*, 2007). Accumulation of hydrogen peroxide in the cell walls is also controlled by reducing agents, most importantly ascorbate, the amount of which is apparently reduced to a minimum in lignifying cell walls in trees through ascorbate oxidase activity (Kärkönen and Fry, 2006; Ros Barceló *et al.*, 2006).

PRX action in the cell wall is, to a large extent, controlled by the microenvironment surrounding the enzyme. In the presence of monolignol substrates and H<sub>2</sub>O<sub>2</sub>, the peroxidative cycle generates monolignol radicals and promotes lignin formation thus participating in cell wall stiffening (Fig. 2). The cell wall structural proteins, extensins, and ferulic acid residues in cell wall polysaccharides may also be the targets of PRX action causing cross-link formation, stiffening of the cell wall and cessation of cell elongation (Brownleader *et al.*, 2000; Fry, 2004). However, in the presence of NADH and H<sub>2</sub>O<sub>2</sub>, PRXs may produce OH which, in turn, causes cell wall loosening and promotes cell elongation (Liskay *et al.*, 2004).

### Class III plant PRX proteins and gene expression in lignifying tissues

Participation of class III plant PRXs in lignin synthesis has been studied in many plant species and tissue culture systems, most importantly in tobacco (*Nicotiana tabacum*) (Lagrimini *et al.*, 1987, 1997; Blee *et al.*, 2003), *Arabidopsis*

*thaliana* (Østergaard *et al.*, 1996, 2000; Nielsen *et al.*, 2001; Ehrling *et al.*, 2005), *Zinnia elegans* (Masuda *et al.*, 1983; Sato *et al.*, 1995, 2006; Lopez-Serrano *et al.*, 2004; Gabaldón *et al.*, 2005) and both gymnosperm and angiosperm tree species (Polle *et al.*, 1994, 1997; Fagerstedt *et al.*, 1998; Tsutsumi *et al.*, 1998; Christensen *et al.*, 1998, 2001; McDougal, 2001; Kärkönen *et al.*, 2002; Li *et al.*, 2003; Marjamaa *et al.*, 2003, 2006a, b; Koutaniemi *et al.*, 2005, 2007). Most of these studies are based on finding PRXs with suitable catalytic properties, i.e. the ability to oxidize monolignol substrates and the proper localization of proteins or gene expression in lignifying xylem and, more precisely, within the lignifying cell walls. By contrast, there are only a few examples of transgenic plants or mutant lines with modified PRX expression and, consequently, altered lignification patterns (Quiroga *et al.*, 2000; Blee *et al.*, 2003; Li *et al.*, 2003). This reflects the problems caused by the large gene number and possible functional redundancy of these enzymes.

Promoter-reporter gene fusion studies have shown that the gene coding for anionic *Arabidopsis* PRX *AtPrx53* (*AtPA2*), which has monolignol oxidation ability (Østergaard *et al.*, 2000; Nielsen *et al.*, 2001), is expressed in lignifying tissues. A mutant *Arabidopsis* line with elevated expression levels of this gene has increased lignification in vascular tissues (Østergaard *et al.*, 2000). In addition, in expression analysis of lignin synthesis-related genes of *Arabidopsis*, eight PRXs showed similar expression profiles as monolignol biosynthetic genes (Ehrling *et al.*, 2005). A number of studies point to the participation of cationic PRX(s) in the lignification in *Zinnia elegans*. These are well able to oxidize both coniferyl and sinapyl alcohols and have been located in lignifying secondary cell walls in *Zinnia* hypocotyls and cell suspension cultures (López-Serrano *et al.*, 2004; Gabaldón *et al.*, 2005; Sato *et al.*, 2006). In addition, the cationic PRX of tomato with pI 9.6 has been shown to be expressed in cells undergoing lignin and suberin biosynthesis according to *in situ* RNA hybridization experiments (Quiroga *et al.*, 2000).

### PRXs in lignin-forming tissue-culture systems

Lignin biosynthesis has been studied in tissue culture systems where the cells secrete a lignin-like polymeric compound into the growth medium, and also in *Zinnia elegans* cell cultures where individual cells undergo differentiation into TEs with thick and lignified secondary cell walls (Kärkönen *et al.*, 2002; Obara and Fukuda, 2005).

Lignin secreted by tissue cultures appears to represent early developmental lignins, as it contains a higher proportion of H units and condensed linkages than lignin isolated from wood (Brunow *et al.*, 1990, 1993; Lange *et al.*, 1995). In the lignin-forming Norway spruce (*Picea abies*) tissue-culture system, several PRX isoforms are secreted in the growth medium (Kärkönen *et al.*, 2002). Two of these, the cationic isoenzymes PabPrx04 (PaPx4) and PabPrx05

(PaPx5) have been purified and cloned (Koutaniemi *et al.*, 2005). Both of these enzymes oxidized coniferyl and *p*-coumaryl alcohols (PabPrx04 preferred *p*-coumaryl alcohol, PabPrx05 preferred coniferyl alcohol), while they showed no ability to catalyse sinapyl alcohol oxidation (Koutaniemi *et al.*, 2005). In this tissue culture, inhibition of PRX activity through H<sub>2</sub>O<sub>2</sub> scavenging caused a drastic reduction in lignin formation (Kärkönen *et al.*, 2002).

*Zinnia elegans* tissue culture mesophyll cells are induced by a low auxin/cytokinin ratio to transdifferentiate into TEs and eventually go through programmed cell death (Groover *et al.*, 1997). The process is synchronous and up to 50% of the cells differentiate. A microarray analysis of different stages of TE development have revealed that genes coding for putative lignin polymerizing enzymes, one PRX and six laccases, were specifically expressed in lignifying TEs, while the monolignol biosynthetic genes were apparently expressed both in lignifying TEs and in non-lignifying cells (Demura *et al.*, 2002). This suggests that the monolignols and H<sub>2</sub>O<sub>2</sub>, needed for polymerization, were very likely supplied by the non-lignifying parenchyma-like cells in the culture (Hosokawa *et al.*, 2001; Pesquet *et al.*, 2005; Gomez Ros *et al.*, 2006). The *Zinnia elegans* PRX gene *ZePrx01* (*ZPO-C*) expressed specifically in differentiating TEs and the *ZePrx01* transcript has been shown to accumulate transiently at the time of secondary wall thickening of TEs in the xylogenic culture of *Zinnia* cells (Sato *et al.*, 2006). In the same study, *in situ* hybridization indicated specific accumulation of the *ZePrx01* transcript in immature vessels in *Zinnia* seedlings and the *ZePrx01* antibody showed that the *ZePrx01* protein is abundant in TEs, especially at their secondary walls.

### PRXs in lignifying xylem of trees

During secondary growth, trees produce large amounts of secondary xylem thus providing researchers with a good source of tissue material undergoing lignification. In addition, lignin in trees has commercial significance since it affects the utilization of wood material for construction, for pulp and paper manufacture, and even for cellulose hydrolysis for bioethanol production.

Genes and enzymes involved in monolignol biosynthesis and also lignin polymerization have been studied extensively (Boerjan *et al.*, 2003; Marjamaa *et al.*, 2007). PRX activity arising from several PRX isoforms has been found often in protein extracts of lignifying secondary xylem of trees (Polle *et al.*, 1997; Fagerstedt *et al.*, 1998; Tsutsumi *et al.*, 1998; Christensen *et al.*, 1998, 2001; McDougal, 2001; Marjamaa *et al.*, 2003, 2006a). In the differentiating xylem of poplar (*Populus trichocarpa*) three anionic isoenzymes PabPrx03, PabPrx04, and PabPrx05 (PXP 3, 4, and 5), which use syringaldazine, a sinapyl alcohol analogue, as a substrate have been found (Christensen *et al.*, 1998). The cationic PRX PalPrx08 with an ability to oxidize even polymeric substrates has been located in the middle lamellae, cell corners, and secondary cell walls of lignifying fibres in white poplar (*Populus alba*) (Sasaki *et al.*, 2006). The genomic

sequence of *Populus trichocarpa* is now available and provides valuable material for studying lignification related genes in trees (Tuskan *et al.*, 2006). In this poplar genome, 34 phenylpropanoid and lignin biosynthetic genes have been identified and in the PeroxiBase (<http://peroxidase.isb-sib.ch/>), the PRX specific database (Bakalovic *et al.*, 2006), sequence information of 105 class III PRXs can be found at the moment. Determination of the role of these PRXs in lignification is a future challenge.

Several PRX isoforms have been found in protein extracts of Norway spruce (*Picea abies*), Scots pine (*Pinus sylvestris*), and silver birch (*Betula pendula*) stems during secondary growth (Marjamaa *et al.*, 2003). In Norway spruce, the cationic forms are dominant whereas, in silver birch, most of the activity seems to arise from the anionic isoforms (Marjamaa *et al.*, 2003). When partially purified, the PRX fractions from Norway spruce, in general, preferred coniferyl alcohol as a substrate, while in silver birch at least one of the anionic isoforms showed the highest oxidation rate with sinapyl alcohol (Marjamaa *et al.*, 2006a). In an RT-PCR study of lignin biosynthesis-related genes of Norway spruce by Koutaniemi *et al.* (2007), it was shown that at least 11 of the 17 PRX genes tested were expressed in lignifying xylem of adult trees, but the highest expression in all the lignin-forming materials (lignifying tissue-culture line, mature xylem, young vertical xylem, and young compression wood) was related to *PabPrx02*, *PabPrx03*, *PabPrx08*, *PabPrx13*, and *PabPrx14* genes. However, based on up-regulation under both pathogen attack and in compression wood, *PabPrx02*, and *PabPrx03* appeared to have a general stress-induced function (Koutaniemi *et al.*, 2007). When tissue and cell-specific expression of three Norway spruce PRXs was studied using *in situ* hybridization, it was found that at least *PabPrx01* and *PabPrx02* transcripts coding for cationic PRXs were found in developing tracheids but not in ray cells of Norway spruce xylem (Marjamaa *et al.*, 2006b).

The final localization of the PRX proteins must be considered when attempting to reveal their functions. The amino acid sequences of class III plant PRXs typically begin with an N-terminal secretion signal peptide for ER targeting, which can usually be easily recognized. In some of the PRXs, the signal peptide is followed by an N-terminal extension with unknown function (Welinder *et al.*, 2002). Many PRXs are also found in vacuoles of plants (Carter *et al.*, 2004), and the vacuolar localization is often thought to be related to the presence of a C-terminal extension peptide (Matsui *et al.*, 2003), which however, are often variant in structure. In addition, PRXs with binding ability to pectin (Carpin *et al.*, 2001), lignin (Koutaniemi *et al.*, 2008), and the plasma membrane (Mika and Lüthje, 2003) have been identified. It is well known that the microenvironment in the cell walls, including, for example, structural carbohydrates, affects the lignin structures. In addition, the local concentrations of monolignols or polymerizing enzymes and pH affect the radical and lignin polymer formation and ratios of specific linkages in the polymer, suggesting that spatial distribution of PRXs or other oxidative enzymes may have an impact on lignin

polymer formation (Brunow *et al.*, 1998; Sipilä *et al.*, 2004; Mechin *et al.*, 2007).

## Transgenic plants and mutant lines with altered PRX expression and lignification

Despite intensive research of many years, there are only a few examples where modification of PRX gene expression has been reported to have an impact on xylem lignification in transgenic plants. This may be due to functional redundancy of various PRXs located at the lignifying cell wall. Down-regulation of the gene coding for a cationic PRX *NtPrx60* (*TP60*) in tobacco resulted in up to a 50% reduction in the amount of lignin measured by the acetyl bromide method (Blee *et al.*, 2003), while overproduction of a tobacco anionic PRX showed no impact on the lignin content of roots, leaves or stems of the transgenic tobacco plants (Lagrimini *et al.*, 1997). However, the plants suffered from decreased root biomass and root branching which caused wilting. In further experiments with tobacco anionic PRX, Lagrimini *et al.* (1997) showed that this PRX gene (under its own promoter) is developmentally regulated and tissue-specific and is expressed in the epidermis and trichomes and in parenchymal tissues associated with vasculature but not in vascular tissue. Hence, this particular PRX does not seem to take part in lignin polymerization in TEs. In transgenic aspen lines, lignin content determined by the modified acetyl bromide method decreased up to 20% resulting from the down-regulation of an anionic PRX *PkPrx03* (*PrxA3a*) (Li *et al.*, 2003). *Arabidopsis thaliana* T-DNA mutant lines with defective genes encoding homologues of *PalPrx08*, with Tyr-177 or Tyr-74 showed 12.6% and 15.9% reduction in lignin, respectively (Tsutsumi *et al.*, 2008). Over-expression of the gene coding for a cationic PRX caused ectopic lignification in transgenic tomato (*Lycopersicon esculentum*) plants (El Mansouri *et al.*, 1999).

It has been reported that altered PRX expression may cause structural changes in lignin. The low lignin transgenic aspen lines described by Li *et al.* (2003) showed an increased proportion of syringyl units. Over-expression of a cationic PRX *PabPrx08* (*SPI2*) caused reduced flexibility, deeper red phloroglucinol staining (a lignin stain with the highest reactivity to coniferaldehyde), and slightly increased frequency of aldehyde end groups in some transgenic tobacco lines (Elfstrand *et al.*, 2002). Taken together, and depending on the species in question, it may be necessary to modify the expression of multiple genes coding for cell wall located PRXs in order to achieve a controlled reduction in lignin polymerization.

## Conclusions

The large number of class III secretable plant PRXs poses many problems in the identification of the true lignin polymerizing PRXs in lignifying tissues. As seen through substrate specificity, RT-PCR, and *in situ* hybridization studies, many PRXs are expressed in the right location and

have the ability to oxidize monolignols resulting in lignin polymer formation. It is only through detailed work on the various PRXs and their signal sequences and substrate specificities and tissue-specific modification of expression levels of possibly multiple *PRX* genes that our knowledge on the last steps in the lignification process can be increased.

As there is some detailed information on the effects of the microenvironment (pH, amount of substrates and inhibitors, antioxidants, effects of other cell wall components) in the cell walls on the specific linkages formed in the lignin polymer by PRXs or laccases, we cannot expect to get natural lignin formed in test tube experiments. In addition, the formation of particular lignin structures in plants *in situ* has to be studied further, as well as their relations to other cell wall components.

## Acknowledgements

This study was supported by the Finnish Centre of Excellence in Plant Signal Research granted by the Academy of Finland (grant number 213509).

## References

- Aoyama W, Sasaki S, Matsumura S, Hirai H, Tsutsumi Y, Nishida T.** 2002. Sinapyl alcohol-specific peroxidase isoenzyme catalyses the formation of the dehydrogenative polymer from sinapyl alcohol. *Journal of Wood Science* **48**, 497–504.
- Arrieta-Baez D, Stark RE.** 2006. Modeling suberization with peroxidase-catalysed polymerization of hydroxycinnamic acids: cross-coupling and dimerization reactions. *Phytochemistry* **67**, 743–753.
- Bakalovic N, Passardi F, Ioannidis V, Cosio C, Penel C, Falquet L, Dunand C.** 2006. PeroxiBase: a class III plant peroxidase database. *Phytochemistry* **67**, 534–539.
- Berglund GI, Carlsson GH, Smith AT, Szöke H, Henriksen A, Hajdu J.** 2002. The catalytic pathway of horseradish peroxidase at high resolution. *Nature* **417**, 463–468.
- Blee KA, Choi JW, O'Connell AP, Chung W, Lewis NG, Bolwell GP.** 2003. A lignin specific peroxidase in tobacco whose antisense suppression leads to vascular tissue modification. *Phytochemistry* **64**, 163–176.
- Boerjan W, Ralph J, Baucher M.** 2003. Lignin biosynthesis. *Annual Review of Plant Biology* **54**, 519–546.
- Boija E, Johansson G.** 2006. Interactions between model membranes and lignin-related compounds studied by immobilized liposome chromatography. *Biochimica* **72**, 248–254.
- Brownleader MD, Hopkins J, Mobasher A, Dey PM, Jackson P, Trevan M.** 2000. Role of extension peroxidase in tomato (*Lycopersicon esculentum* Mill.) seedling growth. *Planta* **210**, 668–676.
- Brunow G, Ede RM, Simola LK, Lemmetyinen J.** 1990. Lignins released from *Picea abies* suspension cultures: true native spruce lignins? *Phytochemistry* **29**, 2535–2538.
- Brunow G, Kilpeläinen I, Lapierre C, Lundquist K, Simola LK, Lemmetyinen J.** 1993. The chemical structure of extracellular lignin released by cultures of *Picea abies*. *Phytochemistry* **32**, 845–850.
- Brunow G, Kilpeläinen I, Sipilä J, Syrjänen K, Karhunen P, Setälä H, Rummakko P.** 1998. Oxidative coupling of phenols and the biosynthesis of lignin. In: Lewis N, Sarkanen S, eds. *Lignin and lignan biosynthesis*. New Orleans, LA: American Chemical Society, 131–147.
- Caliskan M, Cuming AC.** 1998. Spatial specificity of H<sub>2</sub>O<sub>2</sub>-generating oxalate oxidase gene expression during wheat embryo germination. *The Plant Journal* **15**, 165–171.
- Carpin S, Crevecoeur M, de Meyer M, Simon P, Greppin H, Penel C.** 2001. Identification of a Ca<sup>2+</sup>-pectate binding site on an apoplastic peroxidase. *The Plant Cell* **13**, 511–520.
- Carter C, Pan S, Zouhar J, Avila EL, Girke T, Raikhel NV.** 2004. The vegetative vacuole proteome of *Arabidopsis thaliana* reveals predicted and unexpected proteins. *The Plant Cell* **16**, 3285–3303.
- Christensen JH, Bauw G, Welinder KG, Van Montagu M, Boerjan W.** 1998. Purification and characterization of peroxidases correlated with lignification in poplar xylem. *Plant Physiology* **118**, 125–135.
- Christensen JH, Overney S, Rohde A, Diaz WA, Bauw G, Simon P, Van Montagu M, Boerjan W.** 2001. The syringaldazine-oxidizing peroxidase PXP 3-4 from poplar xylem: cDNA isolation, characterization and expression. *Plant Molecular Biology* **47**, 581–593.
- Demura T, Tashiro G, Horiguchi G, et al.** 2002. Visualization by comprehensive microarray analysis of gene expression programs during transdifferentiation of mesophyll cells into xylem cells. *Proceedings of the National Academy of Sciences, USA* **99**, 15794–15799.
- Dharmawardhana DP, Ellis BE, Carlso JE.** 1995. A  $\beta$ -glucosidase from lodgepole pine xylem specific for the lignin precursor coniferin. *Plant Physiology* **107**, 331–339.
- Elfstrand M, Sitbon F, Lapierre C, Bottin A, von Arnold S.** 2002. Altered lignin structure and resistance to pathogens in spi 2-expressing tobacco plants. *Planta* **214**, 708–716.
- Ehrling J, Mattheus N, Aeschliman DS, et al.** 2005. Global transcript profiling of primary stems from *Arabidopsis thaliana* identifies candidate genes for missing links in lignin biosynthesis and transcriptional regulators of fibre differentiation. *The Plant Journal* **42**, 618–640.
- El Mansouri I, Mercado JA, Santiago-Dómenech N, Pliego-Alfaro F, Valpuestra V, Quesada MA.** 1999. Biochemical and phenotypical characterization of transgenic tomato plants overexpressing a basic peroxidase. *Physiologia Plantarum* **106**, 355–362.
- Escamilla-Treviño LL, Chen W, Card ML, Shih M-C, Cheng C-L, Poulton JE.** 2006. *Arabidopsis thaliana*  $\beta$ -glucosidases BGLU45 and BGLU46 hydrolyse monolignol glucosides. *Phytochemistry* **67**, 1651–1660.
- Fagerstedt K, Saranpää P, Piispanen R.** 1998. Peroxidase activity, isoenzymes and histological localization in sapwood and heartwood of Scots Pine (*Pinus sylvestris* L.). *Journal of Forestry Research* **3**, 43–47.
- Freudenberg K.** 1959. Biosynthesis and constitution of lignin. *Nature* **183**, 1152–1155.
- Freudenberg K, Harkin JM.** 1963. The glucosides of cambial sap of spruce. *Phytochemistry* **2**, 189–193.
- Fry SC.** 2004. Oxidative coupling of tyrosine and ferulic acid residues: intra- and extra-protoplasmic occurrence, predominance of trimers

and larger products, and possible role in inter-polymeric cross-linking. *Phytochemistry Reviews* **3**, 97–111.

**Gabaldón C, López-Serrano M, Pomar F, Merino F, Cuello J, Pedreño MA, Ros Barceló A.** 2005. Characterization of the last step of lignin biosynthesis in *Zinnia elegans* suspension cell cultures. *FEBS Letters* **580**, 4311–4316.

**Gómez Ros LV, Paradiso A, Gabaldón MA, de Gara L, Ros Barceló A.** 2006. Two distinct cell sources of H<sub>2</sub>O<sub>2</sub> in the lignifying *Zinnia elegans* cell culture system. *Protoplasma* **227**, 175–183.

**Gómez Ros LV, Gabaldón C, Pomar F, Merino F, Pedreño MA, Ros Barceló A.** 2007. Structural motifs of syringyl peroxidases predate not only the gymnosperm-angiosperm divergence but also the radiation of tracheophytes. *New Phytologist* **173**, 63–78.

**Groover A, DeWitt N, Heidel A, Jones A.** 1997. Programmed cell death of plant tracheary elements differentiating *in vitro*. *Protoplasma* **196**, 197–211.

**Guillaumie S, Pichon M, Martinant JP, Bosio M, Goffner D, Barrière Y.** 2007. Differential expression of phenylpropanoid and related genes in brown-midrib *bm1*, *bm2*, *bm3*, and *bm4* young near-isogenic maize plants. *Planta* **226**, 235–250.

**Harkin JM, Obst JR.** 1973. Lignification in trees: indication of exclusive peroxidase participation. *Science* **180**, 296–298.

**Hemm MR, Rider SD, Ogas J, Murry DJ, Chapple C.** 2004. Light induces phenylpropanoid metabolism in *Arabidopsis* roots. *The Plant Journal* **38**, 765–778.

**Hosokawa M, Suzuki S, Umezawa T, Sato Y.** 2001. Progress of lignification mediated by intercellular transportation of monolignols during tracheary element differentiation in isolated *Zinnia* mesophyll cells. *Plant Cell Physiology* **42**, 959–968.

**Jackson PAP, Galinha CIR, Pereira CS, Fortunato A, Soares NC, Amânqio CBQ, Pinto Ricardo CP.** 2001. Rapid deposition of extensin during the elicitation of grapevine callus cultures specifically catalysed by a 40-kilodalton peroxidase. *Plant Physiology* **127**, 1065–1076.

**Kaneda M, Kim H, Rensing KH, Wong JCT, Banno B, Mansfield SD, Samuels LA.** 2008. Tracking monolignols during wood development in lodgepole pine. *Plant Physiology* **147**, 1750–1760.

**Kärkönen A, Koutaniemi S, Mustonen M, Syrjanen K, Brunow G, Kilpeläinen I, Teeri TH, Simola LK.** 2002. Lignification related enzymes in *Picea abies* suspension cultures. *Physiologia Plantarum* **114**, 343–353.

**Kärkönen A, Fry SC.** 2006. Effect of ascorbate and its oxidation products on H<sub>2</sub>O<sub>2</sub> production in cell-suspension cultures of *Picea abies* and in the absence of cells. *Journal of Experimental Botany* **57**, 1633–1644.

**Kawano T.** 2003. Roles of the reactive oxygen species-generating peroxidase reactions in plant defense and growth induction. *Plant Cell Reports* **21**, 829–837.

**Kim YH, Kim CY, Song WK, Park DS, Kwon SY, Lee HS, Bang JW, Kwak SS.** 2008. Overexpression of sweetpotato *swpa4* peroxidase results in increased hydrogen peroxide production and enhances stress tolerance in tobacco. *Planta* **227**, 867–881.

**Koutaniemi S, Toikka MM, Kärkönen A, Mustonen M, Lundell T, Simola LK, Kilpeläinen IA, Teeri TH.** 2005. Characterization of

basic *p*-coumaryl and coniferyl alcohol oxidating peroxidases from lignin forming *Picea abies* suspension culture. *Plant Molecular Biology* **58**, 141–157.

**Koutaniemi S, Warinowski T, Kärkönen A, et al.** 2007. Expression profiling of the lignin biosynthetic pathway in Norway spruce using EST sequencing and real-time RT-PCR. *Plant Molecular Biology* **65**, 311–328.

**Koutaniemi S, Warinowski T, Kärkönen A, Teeri T.** 2008. Characterization of lignin-binding peroxidases. *Abstract PX-S02-6 at the 8th International Peroxidase Symposium* Tampere, Finland, 20–23 August, 2008.

**Kukkola EM, Koutaniemi S, Gustafsson M, Karhunen P, Ruel K, Lundell TK, Saranpää P, Brunow G, Teeri TH, Fagerstedt KV.** 2003. Localization of dibenzodioxocin substructures in lignifying Norway spruce xylem by transmission electron microscopy–immunogold labeling. *Planta* **217**, 229–237.

**Kukkola EM, Koutaniemi S, Pöllänen E, Gustafsson M, Karhunen P, Lundell TK, Saranpää P, Kilpeläinen I, Teeri TH, Fagerstedt KV.** 2004. The dibenzodioxocin lignin substructure is abundant in the inner part of the secondary wall in Norway spruce and silver birch xylem. *Planta* **218**, 497–500.

**Lagrimini LM, Burkhart W, Moyer M, Rothstein S.** 1987. Molecular cloning of complementary DNA encoding the lignin-forming peroxidase from tobacco: molecular analysis and tissue specific expression. *Proceedings of the National Academy of Sciences, USA* **84**, 7542–7546.

**Lagrimini LM, Joly RJ, Dunlap JR, Liu TT.** 1997. The consequence of peroxidase overexpression in transgenic plants on root growth and development. *Plant Molecular Biology* **33**, 887–895.

**Lange BM, Lapierre C, Sandermann Jr H.** 1995. Elicitor-induced spruce stress lignin (structural similarity to early developmental lignins). *Plant Physiology* **108**, 1277–1287.

**Leinhos V, Udagama-Randeniya PV, Savidge RA.** 1994. Purification of an acidic coniferin-hydrolysing β-glucosidase from developing xylem of *Pinus banksiana*. *Phytochemistry* **37**, 311–315.

**Li Y, Kajita S, Kawai S, Katayama Y, Morohoshi N.** 2003. Down-regulation of an anionic peroxidase in transgenic aspen and its effect on lignin composition. *Journal of Plant Research* **116**, 175–182.

**Liszkay A, Kenk B, Schopfer P.** 2003. Evidence for the involvement of cell wall peroxidase in the generation of hydroxyl radicals mediating extension growth. *Planta* **217**, 658–667.

**Liszkay A, van der Zalm E, Schopfer P.** 2004. Production of reactive oxygen intermediates O<sub>2</sub><sup>-</sup>, H<sub>2</sub>O<sub>2</sub>, and OH by maize roots and their role in wall loosening and elongation growth. *Plant Physiology* **136**, 3114–3123.

**López-Serrano M, Fernández MD, Pomar F, Pedreño MA, Ros-Barceló A.** 2004. *Zinnia elegans* uses the same peroxidase isozyme complement for cell wall lignification in both single-cell tracheary elements and xylem vessels. *Journal of Experimental Botany* **55**, 423–431.

**Marcinowski S, Grisebach H.** 1978. Enzymology of lignification. Cell wall bound β-glucosidase for coniferin from spruce (*Picea abies*) seedlings. *European Journal of Biochemistry* **87**, 37–44.



- Marjamaa K, Hildén K, Kukkola E, et al.** 2006b. Cloning, characterization and localization of three novel class III peroxidases in lignifying xylem of Norway spruce (*Picea abies*). *Plant Molecular Biology* **61**, 719–732.
- Marjamaa K, Kukkola EM, Fagerstedt KV.** 2007. Lignification in development. *International Journal of Plant Developmental Biology* **1**, 160–169.
- Marjamaa K, Kukkola E, Lundell T, Karhunen P, Saranpää P, Fagerstedt KV.** 2006a. Monolignol oxidation by xylem peroxidase isoforms of Norway spruce (*Picea abies*) and silver birch (*Betula pendula*). *Tree Physiology* **26**, 605–611.
- Marjamaa K, Lehtonen M, Lundell T, Toikka M, Saranpää P, Fagerstedt KV.** 2003. Developmental lignification and seasonal variation in  $\beta$ -glucosidase and peroxidase activities in xylem of Scots pine, Norway spruce, and silver birch. *Tree Physiology* **23**, 977–986.
- Masuda H, Fukuda H, Komamine A.** 1983. Changes in peroxidase isoenzyme patterns during tracheary element differentiation in a culture of single cells isolated from mesophyll of *Zinnia elegans*. *Zeitschrift für Pflanzenphysiologie* **112**, 417–426.
- Matsui T, Nakayama H, Yoshida K, Shinmyo A.** 2003. Vesicular transport route of horseradish C1a peroxidase is regulated by N- and C-terminal propeptides in tobacco cells. *Applied Microbiology and Biotechnology* **62**, 517–522.
- McDougal G.** 2001. Cell-wall-associated peroxidases from lignifying xylem of angiosperms and gymnosperms: monolignol oxidation. *Holzforschung* **55**, 246–249.
- Mechin V, Baumberger S, Pollet B, Lapierre C.** 2007. Peroxidase activity can dictate the *in vitro* lignin dehydrogenative polymer structure. *Phytochemistry* **68**, 571–579.
- Mika A, Lüthje S.** 2003. Properties of guaiacol peroxidase activities isolated from corn root plasma membranes. *Plant Physiology* **132**, 1489–1498.
- Møller SG, McPherson MJ.** 1998. Developmental expression and biochemical analysis of the *Arabidopsis atao1* gene encoding an  $H_2O_2$ -generating diamine oxidase. *The Plant Journal* **13**, 781–791.
- Nielsen KL, Indiani C, Henriksen A, Feis A, Becucci M, Gajhede M, Smulevich G, Welinder KG.** 2001. Differential activity and structure of highly similar peroxidases. Spectroscopic, crystallographic and enzymatic analyses of lignifying *Arabidopsis thaliana* peroxidase A2 and horseradish peroxidase A2. *Biochemica* **40**, 11013–11021.
- Obara K, Fukuda H.** 2005. Programmed cell death in xylem differentiation. In: Gray J, ed. *Programmed cell death in plants*. Oxford: Blackwell Publishing, 131–154.
- Østergaard L, Abelskov AK, Mattsson O, Welinder KG.** 1996. Structure and organ specificity of an anionic peroxidase from *Arabidopsis thaliana* cell suspension culture. *FEBS Letters* **398**, 243–247.
- Østergaard L, Teilum K, Mirza O, Mattsson O, Petersen M, Welinder KG, Mundy J, Gajhede M, Henriksen A.** 2000. *Arabidopsis* ATP A2 peroxidase. Expression and high resolution structure of a plant peroxidase with implications for lignification. *Plant Molecular Biology* **44**, 231–243.
- Passardi F, Longet D, Penel C, Dunand C.** 2004. The class III peroxidase multigenic family in rice and its evolution in land plants. *Phytochemistry* **65**, 1879–1893.
- Pesquet E, Ranocha P, Legay S, Digonnet C, Barbier O, Pichon M, Goffner D.** 2005. Novel markers of xylogenesis in *Zinnia* are differentially regulated by auxin and cytokinin. *Plant Physiology* **139**, 1821–1839.
- Polle A, Otter T, Sandermann Jr H.** 1997. Biochemistry and molecular biology of lignin biosynthesis. In: Rennenberg H, Eschrich W, Ziegler H, eds. *Trees: contributions to modern tree physiology*. Leiden, The Netherlands: Backhuys Publishers, 455–475.
- Polle A, Otter T, Seifert F.** 1994. Apoplastic peroxidases and lignification in needles of Norway spruce (*Picea abies* L.). *Plant Physiology* **106**, 53–60.
- Quiroga M, Guerrero C, Botella MA, Ros Barceló A, Amaya I, Medina MI, Alonso FJ, de Forchetti SM, Tigier H, Valpuesta V.** 2000. A tomato peroxidase involved in the synthesis of lignin and suberin. *Plant Physiology* **122**, 1119–1127.
- Ros Barceló A, Gómez Ros LV, Ferrer MA, Hernández JA.** 2006. The apoplastic antioxidant enzymatic system in the wood-forming tissues of trees. *Trees: Structure and Function* **20**, 145–156.
- Ros Barceló A, Pomar F, López-Serrano M, Martínez P, Pedreño MA.** 2002. Developmental regulation of the  $H_2O_2$ -producing system and basic peroxidase isoenzyme in the *Zinnia elegans* lignifying xylem. *Plant Physiology and Biochemistry* **40**, 325–332.
- Sasaki S, Baba K, Nishida T, Tsutsumi Y, Kondo R.** 2006. The cationic cell-wall-peroxidase having oxidation ability for polymeric substrate participates in the late stage of lignification of *Populus alba* L. *Plant Molecular Biology* **62**, 797–807.
- Sasaki S, Nishida T, Tsutsumi Y, Kondo R.** 2004. Lignin dehydrogenative polymerization mechanism: a poplar cell wall peroxidase directly oxidizes polymer lignin and produces *in vitro* dehydrogenative polymer rich in  $\beta$ -O-4 linkage. *FEBS Letters* **562**, 197–201.
- Sasaki S, Nonaka D, Wariishi H, Tsutsumi Y, Kondo R.** 2008. Role of Tyr residues on the protein surface of cationic cell-wall-peroxidase (CWPO-C) from poplar: potential oxidation sites for oxidative polymerization of lignin. *Phytochemistry* **69**, 348–355.
- Sato Y, Demura T, Yamawaki K, Inoue Y, Sato S, Sugiyama M, Fukuda H.** 2006. Isolation and characterization of a novel peroxidase gene ZPO-C whose expression and function are closely associated with lignification during tracheary element differentiation. *Plant Cell Physiology* **47**, 493–503.
- Sato Y, Sugiyama M, Komamine A, Fukuda H.** 1995. Separation and characterization of the isozymes of wall-bound peroxidase from cultured *Zinnia* cells during tracheary element differentiation. *Planta* **196**, 141–147.
- Savidge RA.** 1989. Coniferin, a biochemical indicator of commitment to tracheid differentiation in conifers. *Canadian Journal of Botany* **67**, 2663–2668.
- Schweikert C, Liskay A, Schopfer P.** 2000. Scission of polysaccharides by peroxidase-generated hydroxyl radicals. *Phytochemistry* **53**, 565–570.
- Sipilä J, Karhunen P, Laine M.** 2004. On the role of dibenzodioxocins in lignin biosynthesis. In: Hoikkala A, Soidinsalo O, Wähälä K, eds. *Polyphenols communications*. Finland: University of Helsinki.
- Srivastava V, Schinkel H, Witzell J, Hertzberg M, Torp M, Srivastava MK, Karpinska B, Melzer M, Wingsle G.** 2007.

Downregulation of high-isoelectric-point extracellular superoxide dismutase mediates alterations in the metabolism of reactive oxygen species and developmental disturbances in hybrid aspen. *The Plant Journal* **49**, 135–148.

**Steeves C, Förster H, Pommer U, Savidge R.** 2001. Coniferyl alcohol metabolism in conifers. I. Glucosidic turnover of cinnamyl aldehydes by UDPG: coniferyl alcohol glucosyltransferase from pine cambium. *Phytochemistry* **57**, 1085–1093.

**Takahama U.** 1995. Oxidation of hydroxycinnamic acid and hydroxycinnamyl alcohol derivatives by laccase and peroxidase: interactions among *p*-hydroxyphenyl, guaiacyl and syringyl groups during the oxidation reactions. *Physiologia Plantarum* **93**, 61–68.

**Takahama U, Oniki T.** 1994. Effects of ascorbate on oxidation of hydroxycinnamic acid derivatives and the mechanism of oxidation of sinapic acid by cell wall-bound peroxidases. *Plant and Cell Physiology* **35**, 593–600.

**Tsuji Y, Fukushima K.** 2004. Behavior of monolignol glucosides in angiosperms. *Journal of Agriculture and Food Chemistry* **52**, 7651–7659.

**Tsutsumi Y, Kiyonaga Y, Sasaki S, Kondo R.** 2008. Impact of cationic cell-wall-peroxidase (CWPO-C) homolog on lignin in *Arabidopsis thaliana*. *Abstract PX-S02-3 at the 8th International peroxidase symposium* Tampere, Finland, 20–23 August 2008.

**Tsutsumi Y, Matsui K, Sakai K.** 1998. Substrate specific peroxidases in woody angiosperms and gymnosperms participate in regulating the dehydrogenative polymerization of syringyl and guaiacyl type lignins. *Holzforschung* **52**, 275–281.

**Tuskan GA, Difazio S, Jansson S, et al.** 2006. The genome of black cottonwood, *Populus trichocarpa* (Torr. & Gray). *Science* **313**, 1596–1604.

**Welinder KG, Justesen AF, Kjaersgård IVH, Jensen RB, Rasmussen SK, Jespersen HM, Duroux L.** 2002. Structural diversity and transcription of class III peroxidases from *Arabidopsis thaliana*. *European Journal of Biochemistry* **269**, 6063–6081.
